# Supplementary material
Source: ML conference proceedings conference paper supplement (https://proceedings.neurips.cc/paper_files/paper/2007/hash/8065d07da4a77621450aa84fee5656d9-Abstract.html)
Supplement: Supplementary file [file 8065d07da4a77621450aa84fee5656d9-Supplemental.zip]

# A Bayesian LDA-Based model for semi-supervised part-of-speech tagging

*Kristina Toutanova and Mark Johnson*

## Bayesian generative model

### Ambiguity Class Model + Context Model

$$P(t|walks, \{noun, verb\}) \sim \text{Dir}(\alpha, \alpha)$$

(Sparse prior)

walks

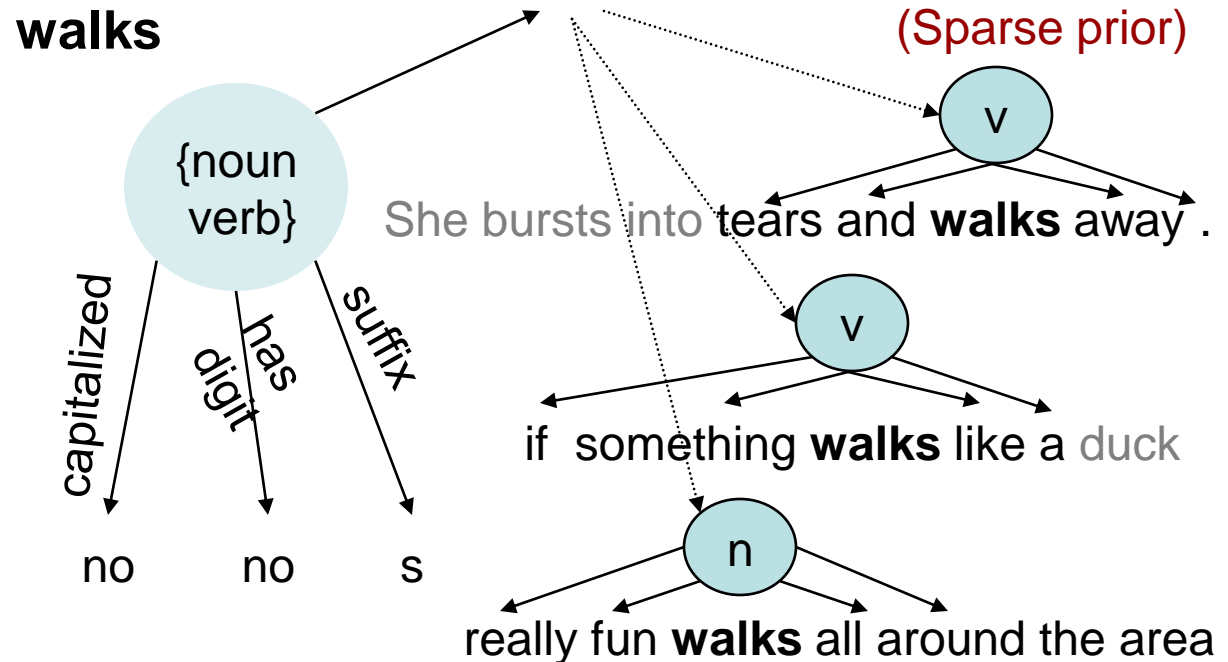

*40 to 50% error reduction over the state of the art*

Unlabeled data

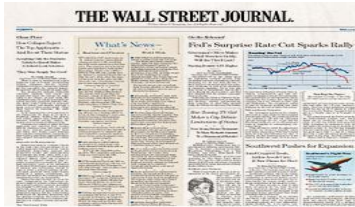

Partial supervision

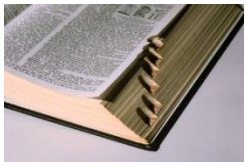

government : {noun}

benefit : {noun, verb}

last. {noun, verb, adverb, adjective}

net. {adjective, noun, verb}

at. {noun, prep., part.}
